# Supplementary material
Source: Springer Nature journal article supplement (https://www.springermedizin.de/resource/supplementary/12879_2011_1431_MOESM4_ESM.pdf/9443218)

Age groups (years)

male

female

Semi Urban

Rural

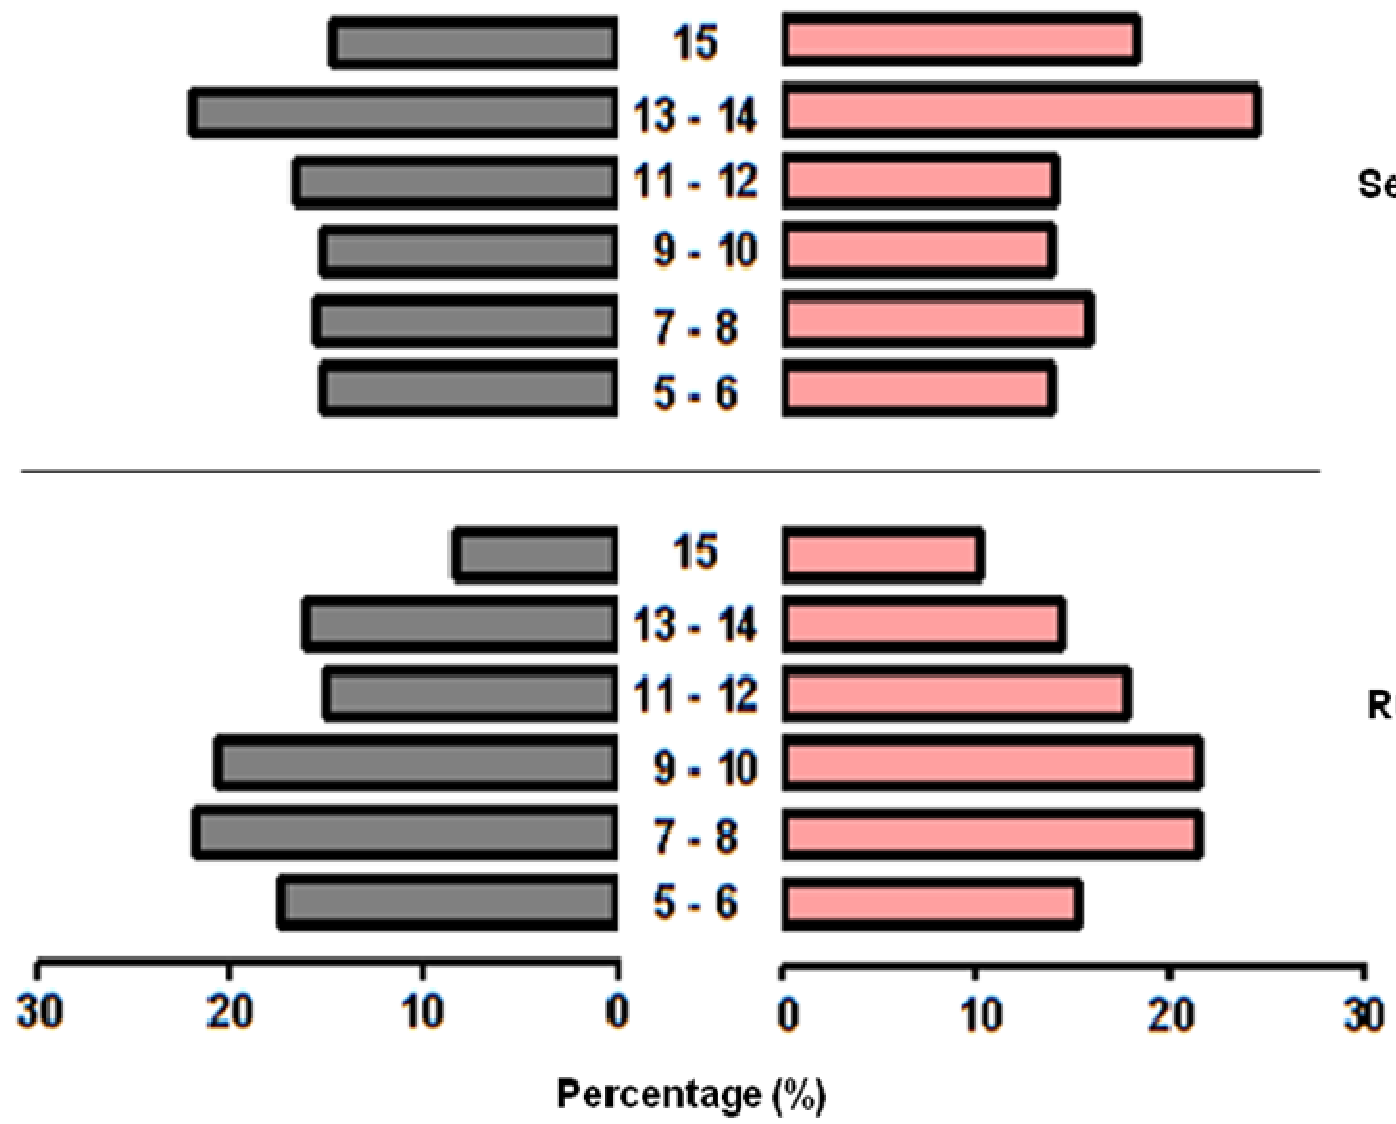

Supplement: MOESM4 [file 9443218]
